# Supplementary material for: Low Skeletal Muscle Index and Myosteatosis as Predictors of Mortality in Critically Ill Surgical Patients
Source: Research Square preprint supplement (doi:10.21203/rs.3.rs-681091/v1), 2021-07-08
Supplement: Supplementary file 1 [file a69af40a04c749b778b9c0bc.docx]

**Supplementary Material**

**eTable 1. Univariate analysis of variables associated with 90-day mortality**

| **Variable** | **HR** | **95% CI** | **p** |
| --- | --- | --- | --- |
| Age | 1.04 | 1.02-1.07 | **0.001** |
| Gender (ref. female) | 0.86 | 0.51-1.46 | 0.575 |
| BMI | 0.97 | 0.92-1.02 | **0.185** |
| Urgent surgery | 1.02 | 0.60-1.74 | 0.951 |
| Complicated elective surgery | 0.98 | 0.57-1.68 | 0.951 |
| Cancer | 0.95 | 0.56-1.61 | 0.858 |
| SAPS II score | 1.06 | 1.03-1.07 | **<0.001** |
| SOFA score | 1.11 | 1.04-1.18 | **0.001** |
| CCI>4 | 2.73 | 1.55-4.82 | **0.001** |
| Skeletal muscle index   - Middle versus lowest tertile - Highest versus lowest tertile | 0.57  0.42 | 0.31-1.05  0.22-0.82 | **0.070**  **0.010** |
| Myosteatosis   - Middle versus lowest tertile - Highest versus lowest tertile | 1.07  3.19 | 0.49-2.36  1.70-5.99 | 0.867  **<0.001** |
| Sarcobesity   - Middle versus lowest tertile - Highest versus lowest tertile | 0.94  1.22 | 0.49-1.83  0.66-2.28 | 0.864  0.525 |

**eFigure 1. Impact of skeletal muscle index (panel A) and myosteatosis (panel B) on 1-year survival.** Estimation of survival is described by a Kaplan-Meier survival curve after dividing the population into 3 groups defined by tertiles of the index distribution.

**A**

**B**

**eTable 2. Multivariate analysis of variables associated with 90-day mortality, without myosteatosis**

Model 1. Only Skeletal muscle index > Harrell’s C=0.768

| **Variable** | **HR** | **95% CI** | **p** |
| --- | --- | --- | --- |
| SAPSII score | 1.05 | 1.04-1.07 | **<0.001** |
| CCI>4 | 2.44 | 1.38-4.31 | **0.002** |
| Skeletal muscle index   - Middle versus lowest tertile - Highest versus lowest tertile | 0.47  0.36 | 0.26-0.87  0.19-0.71 | **0.017**  **0.003** |

**eTable 3. Multivariate analysis of variables associated with 90-day mortality, without Skeletal muscle index**

Model 2. Only Myosteatosis > Harrell’s C=0.768

| **Variable** | **HR** | **95% CI** | **p** |
| --- | --- | --- | --- |
| SAPSII score | 1.05 | 1.03-1.07 | **<0.001** |
| CCI>4 | 2.42 | 1.36-4.29 | **0.003** |
| Myosteatosis   - Middle versus lowest tertile - Highest versus lowest tertile | 1.00  2.31 | 0.45-2.22  1.23-4.34 | 0.994  **0.010** |

**eFigure 2.** Proportion of 90-day mortality reported by combination of low or high SMI (i.e. according to the 50% percentile of SMI) with low or high myosteatosis (i.e. according to the 50% percentile of myosteatosis). P-value for trend was reported. * p<0.05, ** p<0.01 versus Low SMI/High Myosteatosis group.


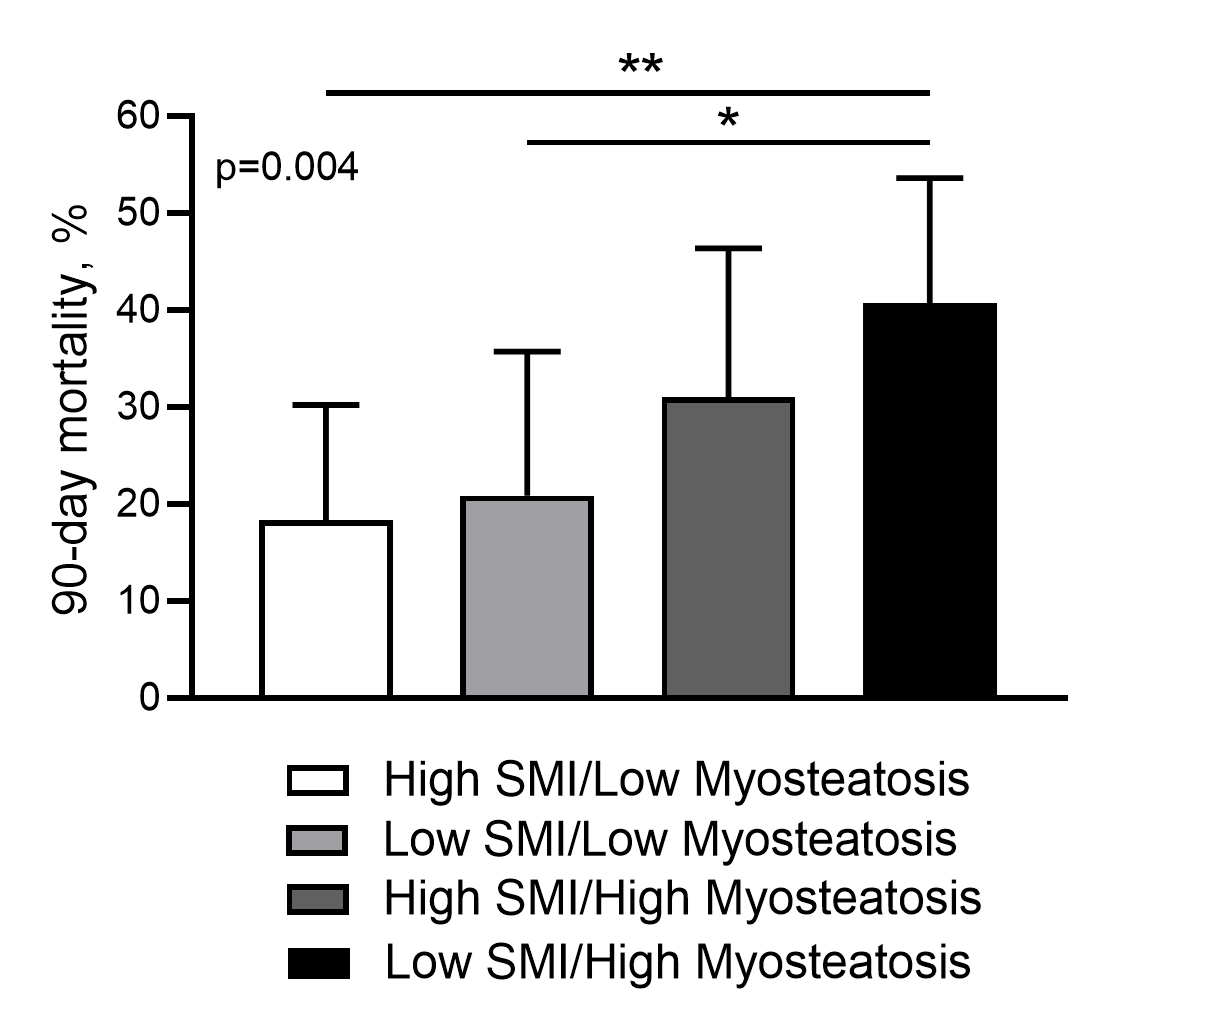


**eFigure 3.** Impact of combination of low or high SMI (i.e. according to the 50% percentile of SMI) with low or high myosteatosis (i.e. according to the 50% percentile of myosteatosis) on 90-day survival. Estimation of survival is described by a Kaplan-Meier survival curve after dividing the population into 4 groups defined by high or low SMI associated with high or low myosteatosis.

**
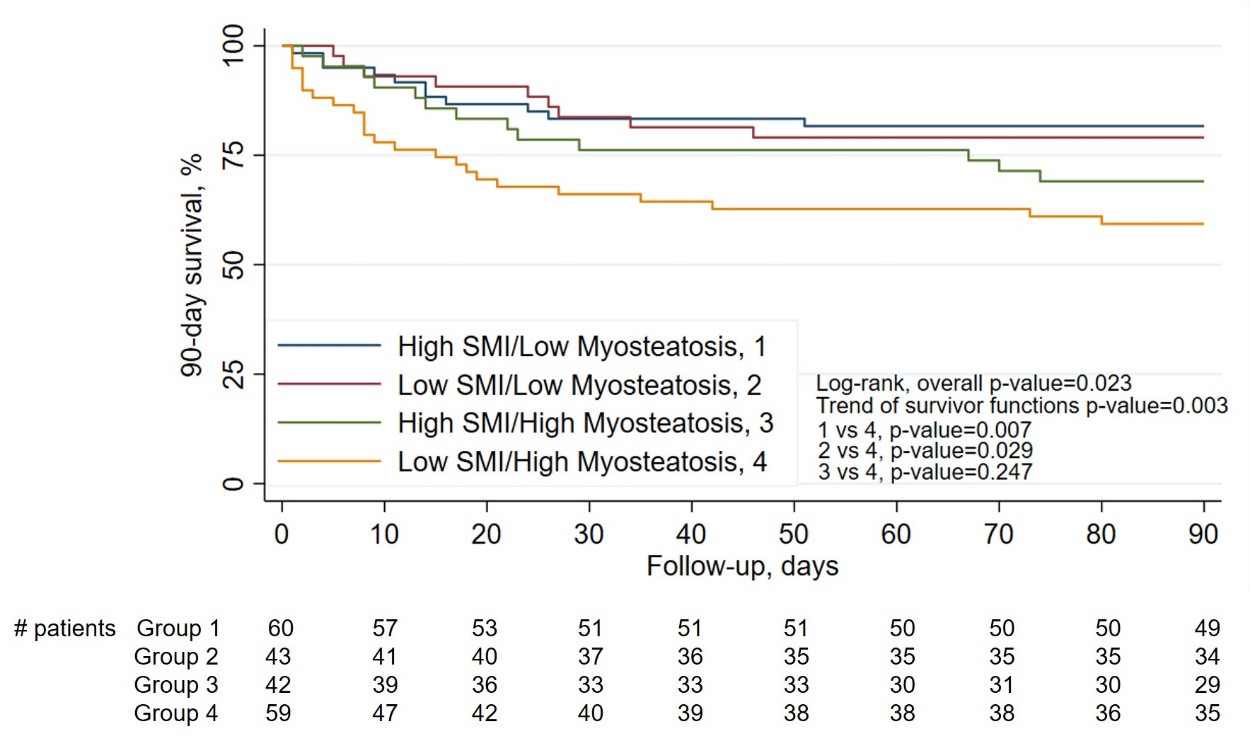
**
